# Supplementary material for: 6H-[1,2,5]Thiadiazolo[3,4-e]thieno[3,2-b]indole-flanked para-azaquinodimethane based aromatic-quinoidal polymer semiconductors with high molecular weights synthesized via direct arylation polycondensation
Source: Royal Society of Chemistry journal article supplement (doi:10.1039/d3ma00037k), 2023-01-01
Supplement: d3ma00037k1.pdf [file d3ma00037k1.pdf]

## Supporting Information

**6*H*-[1,2,5]Thiadiazolo[3,4-*e*]thieno[3,2-*b*]indole-flanked *para*-azaquinodimethane based aromatic-quinoidal polymer semiconductors with high molecular weights synthesized via direct arylation polycondensation**

Yufa Xiao<sup>1</sup>, Huaijie Fu<sup>2</sup>, Zefeng Li<sup>1</sup>, Yingxuan Zheng<sup>1</sup>, Ping Deng<sup>1,\*</sup>, Yanlian Lei<sup>2,\*</sup>, Yan Yu<sup>1,\*</sup>

<sup>1</sup> Key Laboratory of Advanced Materials Technologies, International (HongKong Macao and Taiwan) Joint Laboratory on Advanced Materials Technologies, College of Materials Science and Engineering, Fuzhou University, Fuzhou, Fujian, 350108, China.

<sup>2</sup> School of Physical Science and Technology, Chongqing Key Lab of Micro&Nano Structure Optoelectronics, Southwest University, Chongqing 400715, China

\*Corresponding author

E-mail address: pingdeng@fzu.edu.cn (P. Deng); yllei@swu.edu.cn (Y. Lei); yuyan@fzu.edu.cn (Y. Yu)

## Contents

|                                                                                                   |    |
|---------------------------------------------------------------------------------------------------|----|
| <b>1. Materials and characterization</b> .....                                                    | 1  |
| <b>2. Synthetic procedure</b> .....                                                               | 3  |
| <b>2.1. Synthetic procedures of the monomer M</b> .....                                           | 3  |
| <b>2.2. Synthetic procedures of polymers PQ-1 and PQ-2</b> .....                                  | 6  |
| <b>3. Supporting data</b> .....                                                                   | 8  |
| <b>3.1. Fourier transform mass spectrometry (FT-MS) data of the monomer M</b> .....               | 8  |
| <b>3.2. Fourier transform infrared (FT-IR) spectra of the intermediate and the monomer M</b> ...8 |    |
| <b>3.3. NMR spectra</b> .....                                                                     | 9  |
| <b>3.4. GPC test results of the polymers</b> .....                                                | 14 |
| <b>3.5. TGA and DSC plots of the polymers</b> .....                                               | 15 |
| <b>3.6. Molecular structures of reference materials</b> .....                                     | 16 |
| <b>3.7. UV-vis absorption spectra of the reference molecule M-ref</b> .....                       | 17 |
| <b>3.8. DFT calculations of model molecules</b> .....                                             | 17 |
| <b>4. Device fabrication and characterization</b> .....                                           | 17 |
| <b>5. References</b> .....                                                                        | 18 |

## 1. Materials and characterization

Commercially available solvents and reagents were used without further purification unless otherwise mentioned. Dry methanol, toluene, N, N-dimethylformamide were distilled by calcium hydride prior to use. Tributyl(thiophen-2-yl)stannane, N,N'-diacetylglycine anhydride and 2,5-di(thiophen-2-yl)thieno[3,2-*b*]thiophene were purchased from Shanghai Bide Pharmatech Co., Ltd. Thieno[3,2-*b*]thiophene was purchased from Shanghai Darui Fine Chemicals Co., Ltd. 11-(Bromomethyl)tricosane<sup>1</sup>, 4,7-dibromo-5-nitrobenzo[*c*][1,2,5]thiadiazole<sup>2</sup>, and (2*Z*,5*Z*)-2,5-bis((5-bromothiophen-2-yl)methylene)-3,6-bis((2-decyltetradecyl)oxy)-2,5-dihydropyrazine (**M-ref**)<sup>3</sup> were synthesized according to the published procedures.

Nuclear magnetic resonance (NMR) spectra were measured on a Bruker Avance-600 spectrometer. High temperature gel permeation chromatography (HT-GPC) was tested with a ShimadzuSIL-20A liquid chromatography instrument using 1,2,4-trichlorobenzene (TCB) as eluent at 150 °C with polystyrenes as standards. Thermal gravimetric analysis (TGA) was performed under a nitrogen flow at a heating rate of 20 °C/min with a STA449C system. UV-Vis spectra were measured by Perkinelmer LAMBDA 950. Cyclic voltammetry (CV) was tested on the Ingsens IGS1200 electrochemical analyzer with a three-electrode cell and experiments were carried out in the deoxidation anhydrous acetonitrile solution of tetra-*n*-butylammonium-hexafluorophosphate (0.1 M) under a nitrogen environment. Platinum disk electrode, platinum wire electrode and Ag/AgNO<sub>3</sub> electrode were used as a working electrode, a counter electrode and a reference electrode, respectively. The sample films for electrochemical measurements were coated on the surface of platinum electrode. The CV curves were calibrated using the ferrocene/ferrocenium (Fc/Fc<sup>+</sup>) redox couple as an external standard, which was measured under same condition before and after the measurement of samples. The energy level of Fc/Fc<sup>+</sup> was assumed at -4.8 eV to vacuum. The half-wave potential of Fc/Fc<sup>+</sup> was found to 0.09 V, related to the Ag/Ag<sup>+</sup> reference electrode. The HOMO energy levels of the polymer were calculated using the equation:  $E_{\text{HOMO}} = -e(4.71 + E_{\text{ox}})$  (eV), where  $E_{\text{ox}}$  is the onset oxidation potential

relative to the Ag/Ag<sup>+</sup> reference electrode. The LUMO energy levels of the polymer were calculated using the equation:  $E_{\text{LUMO}} = -e(4.71 + E_{\text{red}})$  (eV), where  $E_{\text{red}}$  is the onset reduction potential relative to the Ag/Ag<sup>+</sup> reference electrode. Mass spectrum (MS) was recorded on an Applied Bruker Solarix XR Fourier transform ion cyclotron resonance mass spectrometry. X-ray diffraction (XRD) measurement was recorded in the range of  $2\theta = 3\sim 32^\circ$  on a desktop X-ray diffractometer (Rigaku MiniFlex 600) with Cu  $K_\alpha$  radiation ( $\lambda = 1.5406 \text{ \AA}$ ). The density functional theory (DFT) calculations were performed with the Gaussian 09 Rev. D.01 employing the B3LYP/6-31g(d) level. The long-branched alkyl chains were all replaced by methyl groups to simplify the calculation.

## 2. Synthetic procedure

### 2.1. Synthetic procedures of the monomer *M*

#### *Synthesis of 7-bromo-5-nitro-4-(thiophen-2-yl)benzo[*c*][1,2,5]thiadiazole (2)*

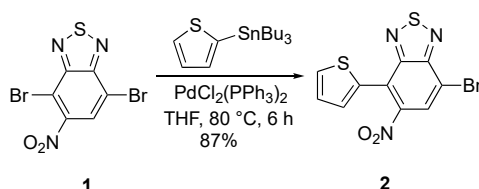

To a dry 100 mL Schlenk tube, compound **1** (3.39 g, 10 mmol), 2-(tributylstannyl)thiophene (3.73 g, 10 mmol),  $\text{PdCl}_2(\text{PPh}_3)_2$  (0.14 g, 0.2 mmol), and anhydrous tetrahydrofuran (THF) (50 mL) was added under argon protection. Then, the mixture was refluxed at 80 °C for 6 h. After cooling to room temperature, the solvent was evaporated and the crude product was then recrystallized with methanol to get the compound **2** as an orange solid (2.97 g, 87%).  $R_f = 0.45$  (petroleum ether /dichloromethane, 3:2, v/v).  $^1\text{H}$  NMR (400 MHz,  $\text{CDCl}_3$ )  $\delta$  8.16 (s, 1H), 7.67 (dd,  $J = 5.1, 1.1$  Hz, 1H), 7.42 (dd,  $J = 3.7, 1.1$  Hz, 1H), 7.21 (dd,  $J = 5.1, 3.7$  Hz, 1H).  $^{13}\text{C}$  NMR (101 MHz,  $\text{CDCl}_3$ )  $\delta$  153.7, 152.9, 130.7, 130.5, 130.3, 127.9, 126.9, 121.5, 114.6.

#### *Synthesis of 4-bromo-6-(2-decyltetradecyl)-6H-[1,2,5]thiadiazolo[3,4-*e*]thieno- [3,2-*b*]indole (3)*

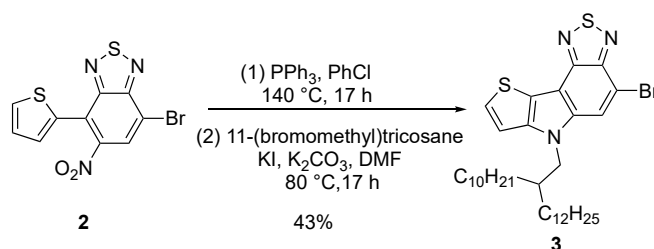

To a dry 100 mL Schlenk tube, compound **2** (3.42 g, 10 mmol), triphenylphosphine (8.39 g, 31.98 mmol) and anhydrous chlorobenzene was added under argon protection. Then, the mixture was heated to 140 °C and kept stirring for 17 h. After cooling to room temperature, the solvent was evaporated under reduced pressure. The solvent was removed under reduced pressure to give the corresponding

residue, which was purified by silicon chromatography using petroleum ether/ethyl acetate (1:4, v/v) as eluent to get an orange solid (2.0 g). This crude product was also directly added to an anhydrous *N,N*-dimethylformamide (40 mL) solution of the 11-(bromomethyl)tricosane (6.73 g, 16.12 mmol), potassium iodide (0.57 mg, 3.44 mmol), and potassium carbonate (2.67 g, 19.34 mmol). Then, the mixture was kept stirring at 80 °C for 17 h. After cooling to room temperature, the mixture was extracted with dichloromethane and washed with water. The collected organic layer was dried over anhydrous MgSO<sub>4</sub> and concentrated. The residue was purified by silicon chromatography using petroleum ether/dichloromethane (3:2, v/v) as eluent to get the compound **3** as an orange oil (2.81 g, 43%). *R*<sub>f</sub> = 0.61 (petroleum ether/dichloromethane, 1:1, v/v). <sup>1</sup>H NMR (400 MHz, CDCl<sub>3</sub>) δ 7.93 (s, 1H), 7.50 (s, 1H), 7.10 (s, 1H), 4.22 (s, 2H), 2.05 (t, *J* = 6.9 Hz, 1H), 1.21 (m, 40H), 0.88 (m, 6H). <sup>13</sup>C NMR (101 MHz, CDCl<sub>3</sub>) δ 150.2, 148.3, 144.8, 138.8, 128.8, 119.9, 118.0, 110.7, 110.4, 106.9, 50.6, 39.3, 32.1, 32.0, 31.7, 30.0, 29.8, 29.7, 29.7, 29.5, 29.4, 26.5, 22.8, 14.3.

**Synthesis of 4-bromo-6-(2-decyltetradecyl)-6H-[1,2,5]thiadiazolo[3,4-*e*]thieno- [3,2-*b*]indole-8-carbaldehyde (**4**)**

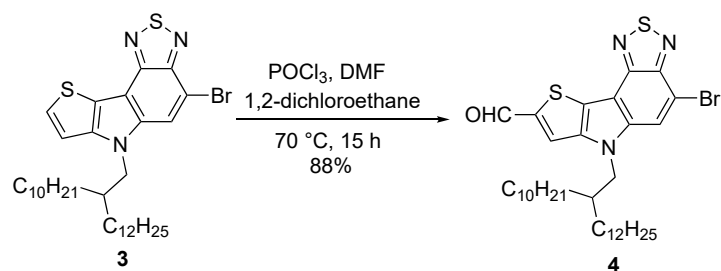

To a dry 250 mL round-bottom flask, compound **3** (3.11 g, 4.80 mmol), anhydrous *N,N*-dimethylformamide (2.5 mL) and 1,2-dichloroethane (70 mL) was added under argon protection. The mixture was stirred at 0 °C for 0.5 hour, followed by adding phosphorus oxychloride (3.7 mL) dropwise and was heated to 70 °C for 15 h. After cooling to room temperature, 70 mL 0.1 M aqueous K<sub>2</sub>CO<sub>3</sub> solution was added and the mixture was extracted three times with dichloromethane. The combined

organic layers were washed three times with brine, and then dried with magnesium sulphate. After removal of the solvent under reduced pressure, the residue was purified by silicon chromatography using petroleum ether/dichloromethane (1:5, v/v) as eluent to get the compound **4** as a yellow solid (3.15 g, 97%).  $R_f = 0.33$  (petroleum ether/dichloromethane, 1:5, v/v).  $^1\text{H NMR}$  (400 MHz,  $\text{CDCl}_3$ )  $\delta$  9.99 (s, 1H), 7.91 (s, 1H), 7.72 (s, 1H), 4.23 (s, 2H), 2.05 (s, 1H), 1.21 (m, 40H), 0.87 (m, 6H).  $^{13}\text{C NMR}$  (101 MHz,  $\text{CDCl}_3$ )  $\delta$  183.4, 150.4, 148.3, 145.2, 143.3, 141.6, 124.8, 119.5, 118.5, 111.3, 110.0, 50.8, 39.3, 32.1, 32.0, 31.7, 30.0, 29.8, 29.7, 29.6, 29.5, 29.4, 26.5, 22.8, 14.3.

**Synthesis of 8,8'-((1Z,1'Z)-(3,6-bis((2-decyltetradecyl)oxy)pyrazine-2,5-diylidene)bis(methaneylylidene))bis(4-bromo-6-(2-decyltetradecyl)-6H-[1,2,5]thiadiazolo[3,4-e]thieno[3,2-b]indole) (M)**

To a dry 48 mL Schlenk tube, compound **4** (1.52 g, 2.25 mmol), N,N'-diacetylglycine anhydride (0.18 g, 0.9 mmol), triethylamine (3.5 mL, 25.2 mmol) and anhydrous N,N-dimethylformamide (5.0 mL) was added under argon protection. Then, the mixture was heated to 120 °C and kept stirring for 20 h. After cooling to room temperature, 100 mL methanol was added and the precipitate was collected by filtration. The residue was purified by silicon chromatography using petroleum ether/dichloromethane (1:14, v/v) as eluent to get the diarylidene piperazinedione as a red solid (0.75 g). This crude intermediate product was also directly added to an anhydrous N,N-dimethylformamide (15 mL) solution of the potassium carbonate (0.36 g, 2.63 mmol) and 11-(bromomethyl)tricosane (0.88 g, 2.12 mmol). Then, the mixture was heated to 100 °C for 20 h under argon. After cooling to room temperature, 100 mL methanol was added and the precipitate was collected by filtration. The residue was purified by silicon chromatography using petroleum ether/dichloromethane (5:2, v/v) as eluent and the residue was then recrystallized with ethyl acetate to get the **M** as a black solid (0.91 g, 82.4%).  $R_f = 0.45$  (petroleum ether/dichloromethane, 2:5, v/v).  $^1\text{H NMR}$  (600 MHz,  $\text{CDCl}_3$ )  $\delta$  7.78 (d,  $J = 34.7$  Hz, 2H), 7.21 (s, 2H), 7.15 (d,  $J = 27.6$  Hz, 2H), 4.61 (m, 4H), 4.06 (d,  $J = 36.1$  Hz, 4H),

2.10 (s, 2H), 2.01 (s, 2H), 1.69-1.60 (m, 10H), 1.44 (s, 8H), 1.34-1.21 (m, 132H), 0.85 (m, 24H).  $^{13}\text{C}$  NMR (151 MHz,  $\text{CDCl}_3$ )  $\delta$  157.6, 150.3, 148.4, 144.1, 143.6, 139.2, 129.3, 124.4, 119.5, 117.6, 111.9, 110.7, 107.0, 71.8, 50.4, 39.0, 37.5, 32.0, 31.7, 30.4, 29.9, 29.9, 29.8, 29.8, 29.8, 29.7, 29.7, 29.6, 29.5, 29.5, 29.4, 29.4, 27.0, 26.5, 22.8, 14.2. HRMS (MALDI FT-ICR) (m/z):  $[\text{M}+\text{H}]^+$  calcd for: Calcd. for  $\text{C}_{122}\text{H}_{203}\text{Br}_2\text{N}_8\text{O}_2\text{S}_4$ : 2098.3273, found: 2098.3295.

## 2.2. Synthetic procedures of polymers PQ-1 and PQ-2

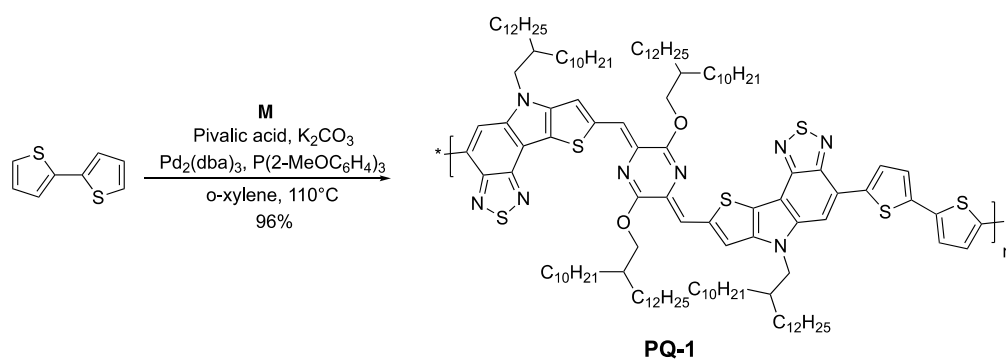

The monomer **M** (210.1 mg, 0.1 mmol), 2,2'-bithiophene (16.9 mg, 0.1 mmol),  $\text{K}_2\text{CO}_3$  (41.4 mg, 0.3 mmol), and pivalic acid (12.2 mg, 0.12 mmol) were carefully weighed into a dry Schlenk tube containing a stirrer bar. The degassed dry 1,2-dichlorobenzene (0.7 mL) was then added under argon and the whole was stirred for 5 min at room temperature in order to fully dissolve the monomers. Then  $\text{Pd}_2(\text{dba})_3$  (2.75 mg, 0.003 mmol) and tris(o-methoxyphenyl)phosphine (3.5 mg, 0.01 mmol) was added under argon. The Schlenk tube was sealed and placed into a preheated oil bath and stirred for 48 h at 130 °C. After cooling to room temperature and additional  $\text{K}_2\text{CO}_3$  (41.4 mg, 0.3 mmol), pivalic acid (12.2 mg, 0.12 mmol),  $\text{Pd}_2\text{dba}_3$  (2.75 mg, 0.003 mmol), and tris(o-methoxyphenyl)phosphine (3.5 mg, 0.01 mmol) were added. The solution was heated at 130 °C for additional 24 h. After cooling to room temperature, the mixture was precipitated into methanol. Then the crude polymer was collected by filtration and purified by Soxhlet extraction with methanol, acetone, and petroleum ether. The petroleum ether solution was then concentrated by evaporation, and it was precipitated from stirring methanol and dried in vacuum at 60 °C to give



the black polymer **PQ-1** (202 mg, 96%).  $^1\text{H NMR}$  (600 MHz,  $\text{CDCl}_3$ )  $\delta$  8.44 (br, 1H), 8.10 (br, 1H), 8.05 (br, 1H), 8.01 (br, 1H), 7.71 (br, 1H), 7.43 (br, 1H), 7.22 (br, 1H), 7.13 (br, 1H), 7.08 (br, 1H), 6.91 (br, 1H), 4.66 (br, 4H), 3.98 (br, 4H), 2.19 (br, 2H), 2.11 (br, 2H), 1.70 - 1.23 (m, 150H), 0.86 (m, 24H). HT-GPC (150 °C, TCB):  $M_n = 155.7$  kDa,  $M_w = 426.5$  kDa,  $D = 2.74$ .

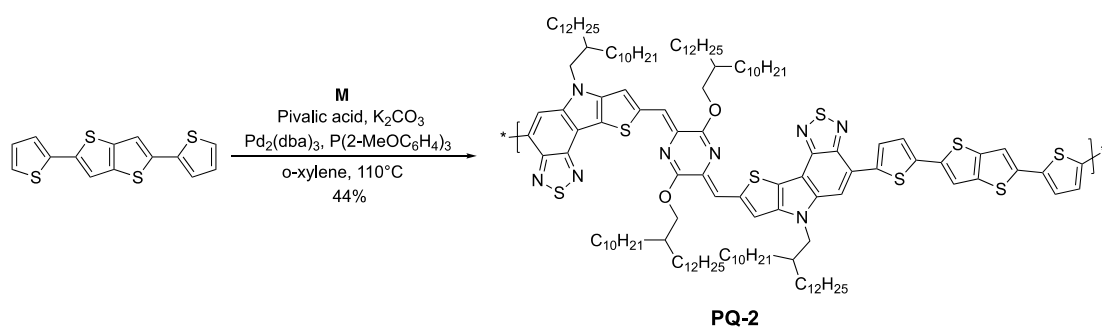

The **M** (210.1 mg, 0.1 mmol), 2,5-dithiophen-2-ylthieno[3,2-*b*]thiophene (31.1 mg, 0.1 mmol),  $\text{K}_2\text{CO}_3$  (41.4 mg, 0.3 mmol), and pivalic acid (12.2 mg, 0.12 mmol) were carefully weighed into a dry vial containing a stirr bar. The degassed dry 1,2-dichlorobenzene (0.7 mL) was then added under argon and the whole was stirred for 5 min at room temperature in order to fully dissolve the monomers. Then  $\text{Pd}_2(\text{dba})_3$  (4.5 mg, 0.005 mmol) and tris(*o*-methoxyphenyl)phosphine (3.5 mg, 0.01 mmol) was added under argon. The vial was sealed and placed into a preheated oil bath and stirred for 3.5 h at 110 °C. After cooling to room temperature, the mixture was precipitated into methanol. Then the crude polymer was collected by filtration and purified by Soxhlet extraction with methanol, petroleum ether, and then chloroform. The chloroform solution was then concentrated by evaporation, and it was precipitated from stirring methanol and dried in vacuum at 60 °C to give the black polymer **PQ-2** (101 mg, 44%).  $^1\text{H NMR}$  (600 MHz,  $\text{CDCl}_3$ )  $\delta$  8.22 (br, 1H), 8.10 (br, 1H), 8.08 (br, 1H), 7.97 (br, 1H), 7.74 (br, 1H), 7.68 (br, 1H), 7.43 (br, 1H), 7.31 (br, 1H), 7.21 (br, 1H), 7.15 (br, 1H), 7.08 (br, 1H), 7.00 (br, 1H), 4.63 (br, 4H), 3.95 (br, 4H), 2.12 (br, 2H), 2.05 (br, 2H), 1.68-1.22 (m, 150H), 0.85 (m, 24H). HT-GPC (150 °C, TCB):  $M_n = 128.7$  kDa,  $M_w = 311.7$  kDa,  $D = 2.43$ .

### 3. Supporting data

#### 3.1. Fourier transform mass spectrometry (FT-MS) data of the monomer *M*

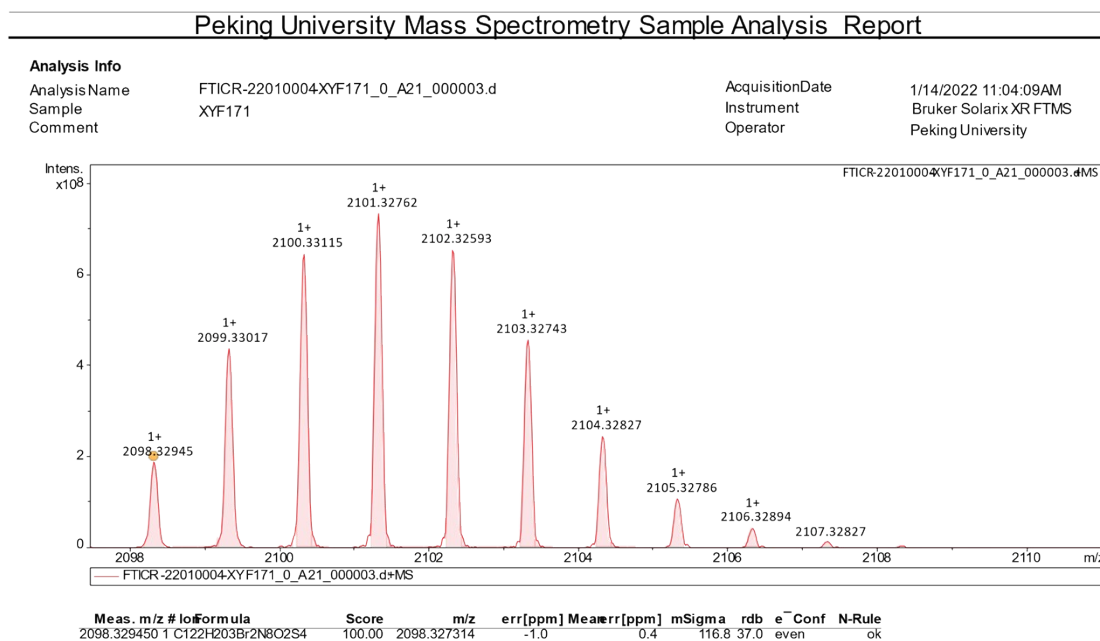

**Figure S1.** Fourier transform mass spectrometry (FT-MS) data of the monomer *M*.

#### 3.2. Fourier transform infrared (FT-IR) spectra of the intermediate and the monomer *M*

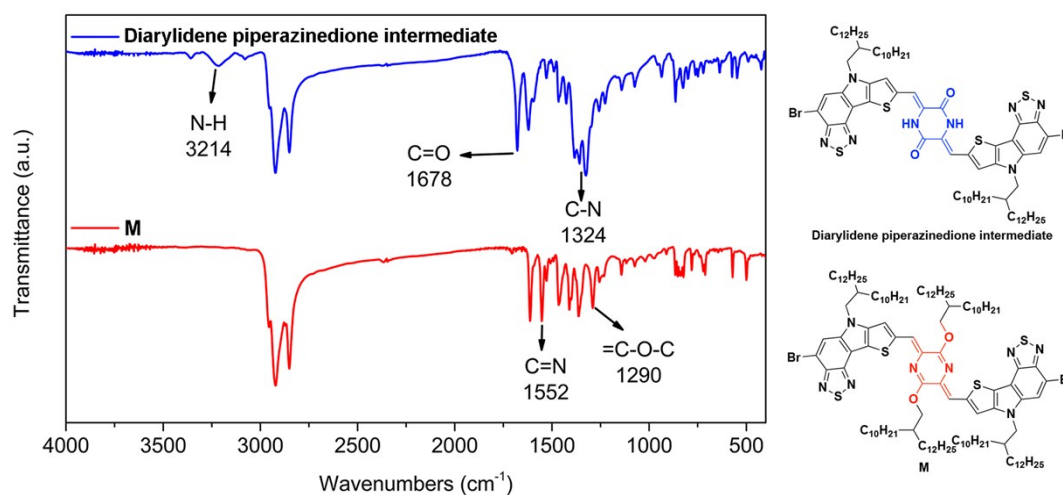

### 3.3. NMR spectra

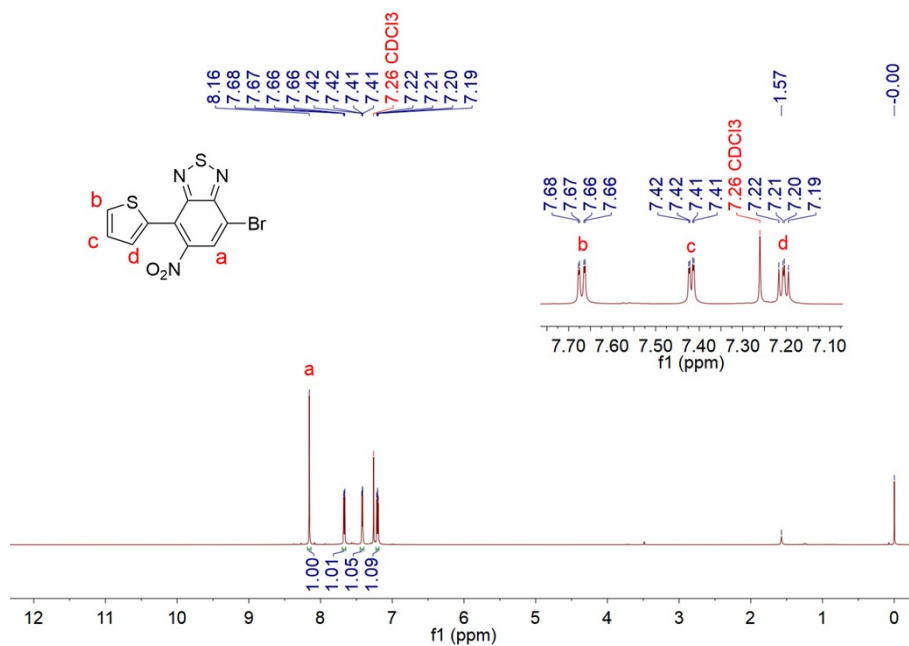

**Figure S3.**  $^1\text{H}$  NMR spectrum of compound **2** in  $\text{CDCl}_3$ .

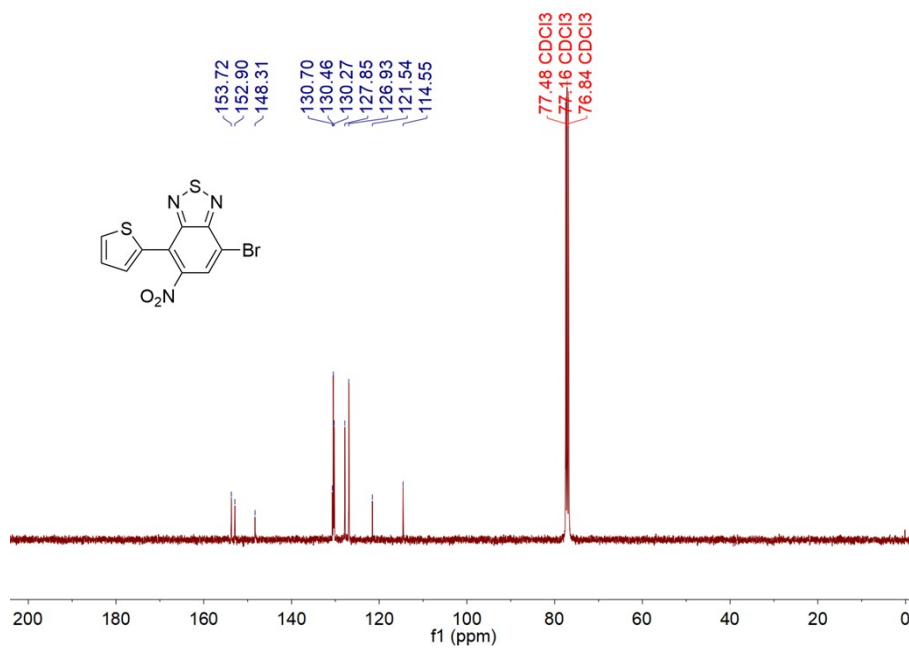

**Figure S4.**  $^{13}\text{C}$  NMR spectrum of compound **2** in  $\text{CDCl}_3$ .

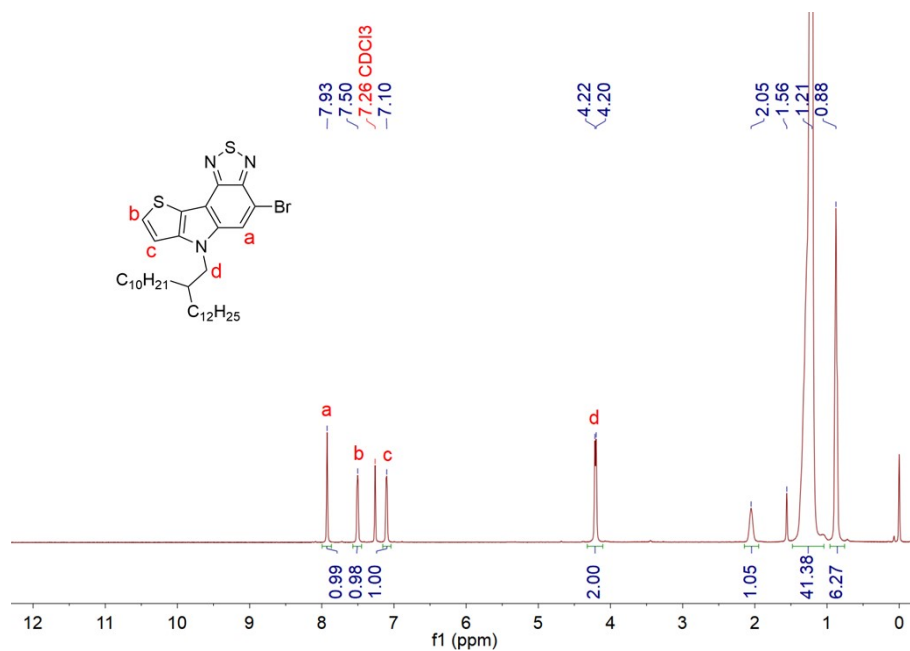

**Figure S5.** <sup>1</sup>H NMR spectrum of compound **3** in CDCl<sub>3</sub>.

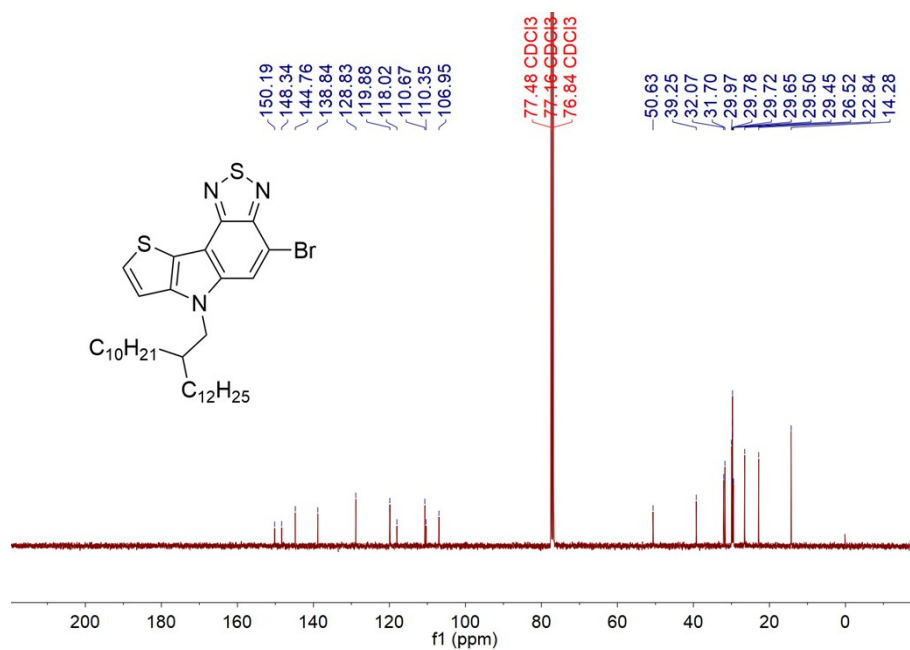

**Figure S6.** <sup>13</sup>C NMR spectrum of compound **3** in CDCl<sub>3</sub>.

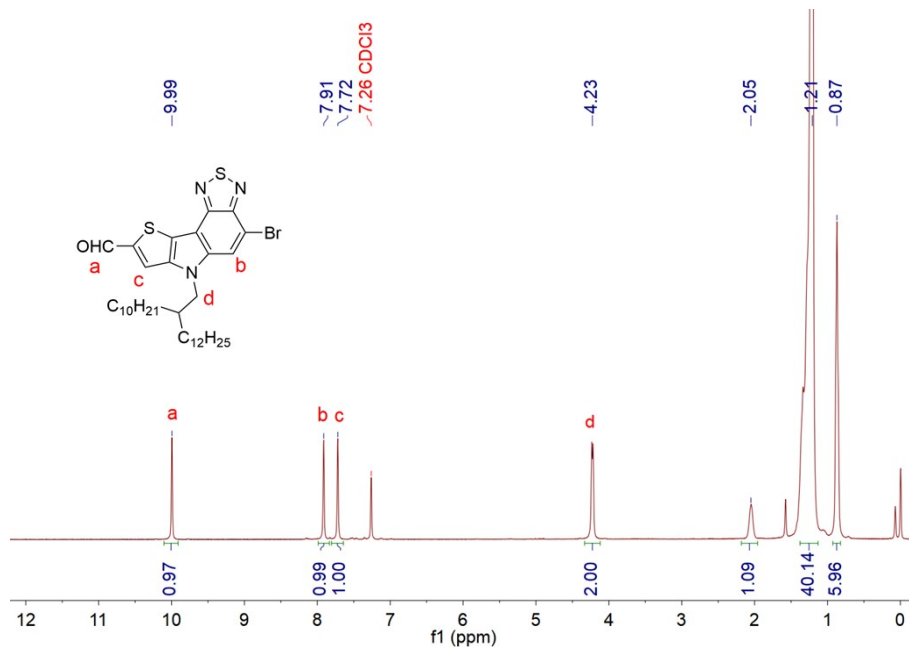

Figure S7.  $^1\text{H}$  NMR spectrum of compound 4 in  $\text{CDCl}_3$ .

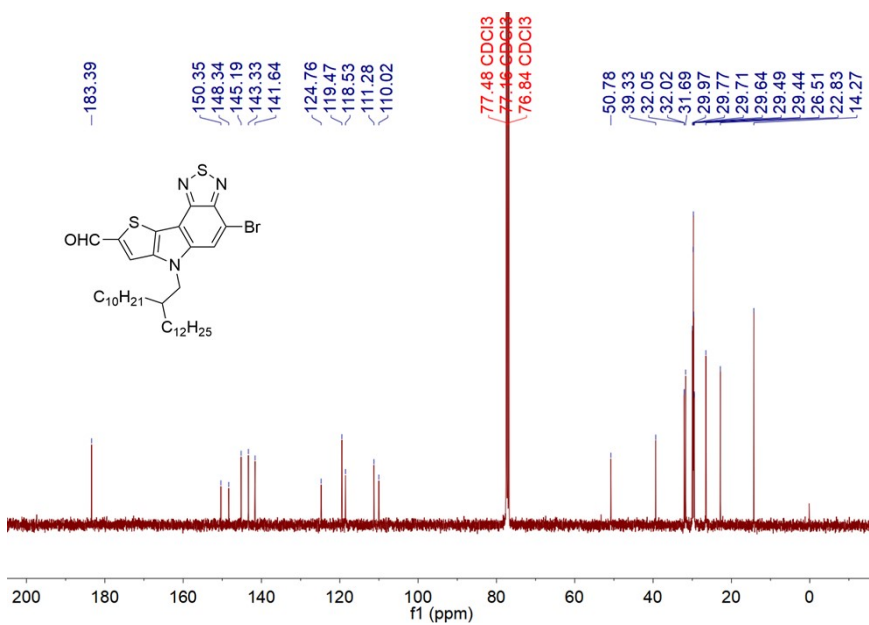

Figure S8.  $^{13}\text{C}$  NMR spectrum of compound 4 in  $\text{CDCl}_3$ .

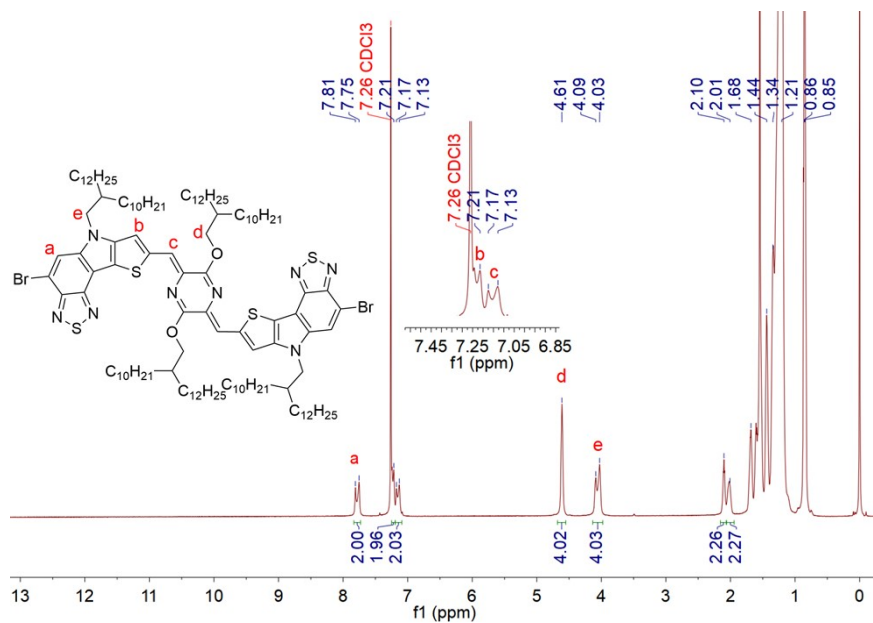

**Figure S9.**  $^1\text{H}$  NMR spectrum of the monomer **M** in  $\text{CDCl}_3$ .

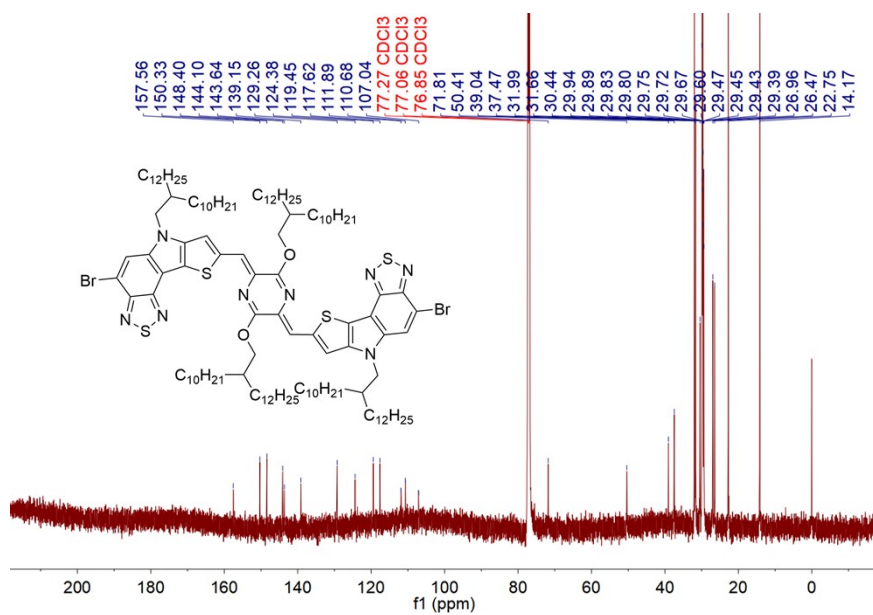

**Figure S10.**  $^{13}\text{C}$  NMR spectrum of the monomer **M** in  $\text{CDCl}_3$ .

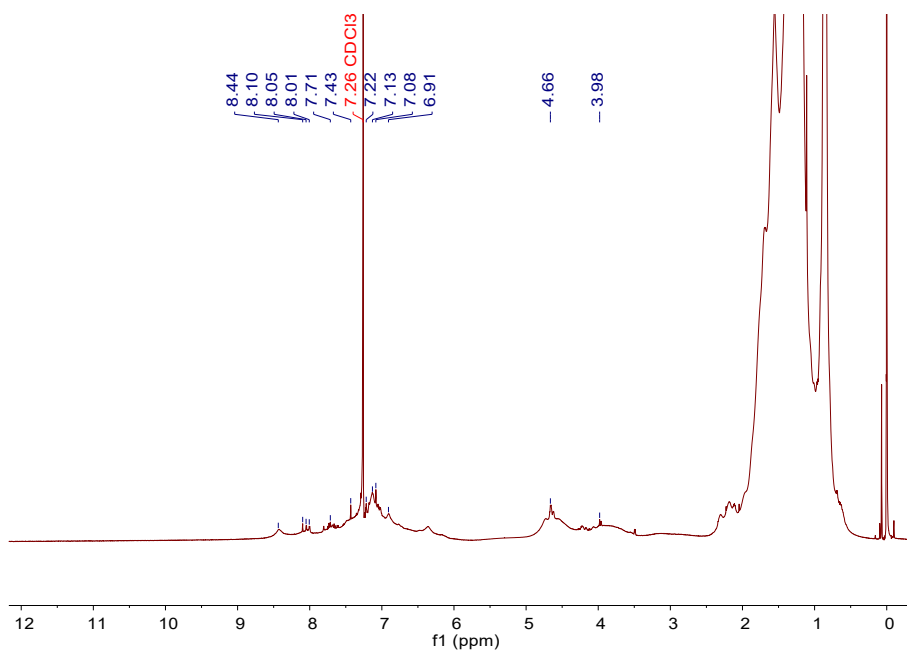

Figure S11. <sup>1</sup>H NMR spectrum of PQ-1 in CDCl<sub>3</sub>.

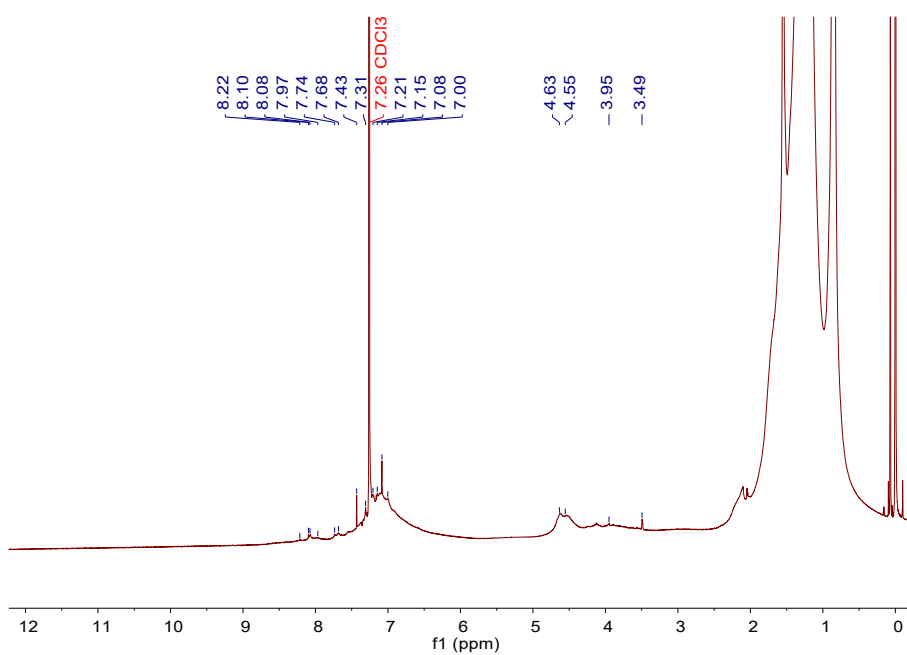

Figure S12. <sup>1</sup>H NMR spectrum of PQ-2 in CDCl<sub>3</sub>.

### 3.4. GPC test results of the polymers

#### Workbook Details

Eluent: TCB stabilised with 0.0125% BHT

Column Set: PLgel MIXED-B LS 300x7.5mm X 2

Detector:

Flow Rate: 1.00 ml/min

Temperature: 150

Injection Volume: 200.0 ul

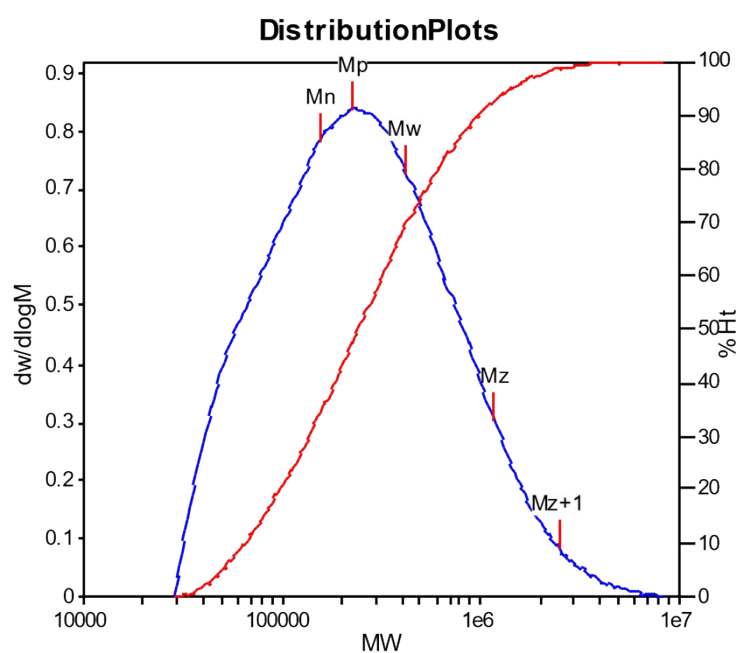

#### MW Averages

| Peak No | $M_p$  | $M_n$  | $M_w$  | $M_z$   | $M_{z+1}$ | $M_v$  | PD      |
|---------|--------|--------|--------|---------|-----------|--------|---------|
| 1       | 226379 | 155740 | 426466 | 1182620 | 2469905   | 356025 | 2.73832 |

**Figure S13.** GPC test result of the polymer **PQ-1** (TCB as eluent, 150 °C).



**MW Averages**

Mp: 159543

Mn: 128257

Mr: 267510

Mw: 311729

Mz: 690491

Mz+1: 1097652

PD: 2.4305

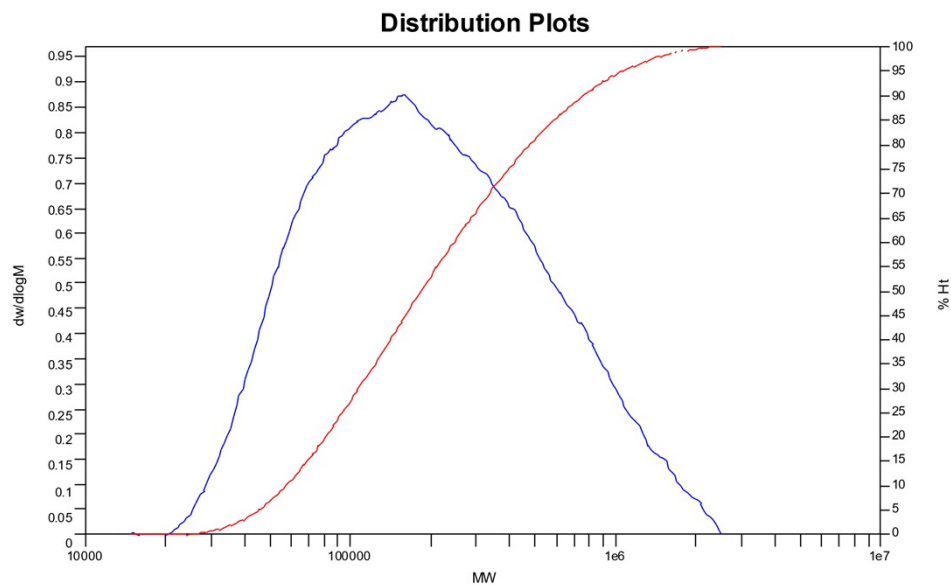

**Figure S14.** GPC test result of the polymer **PQ-2** (TCB as eluent, 150 °C).

**3.5. TGA and DSC plots of the polymers**

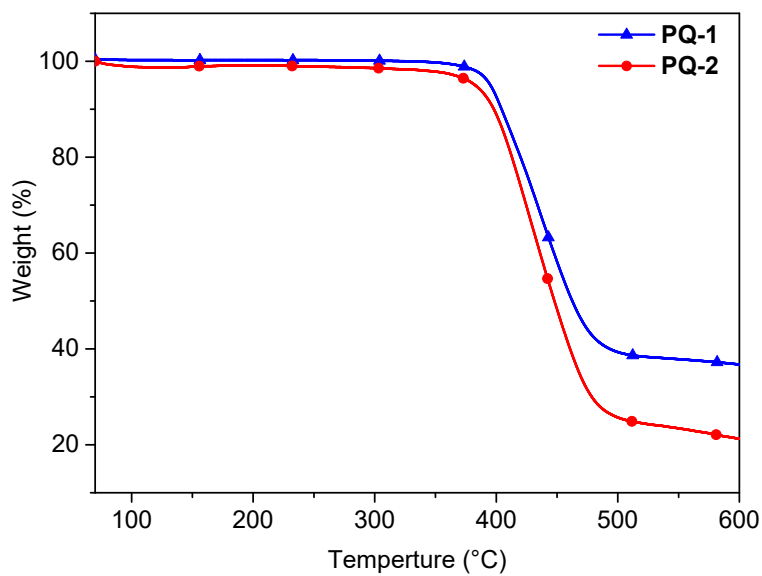

**Figure S15.** TGA plots of the polymers **PQ-1** and **PQ-2**.

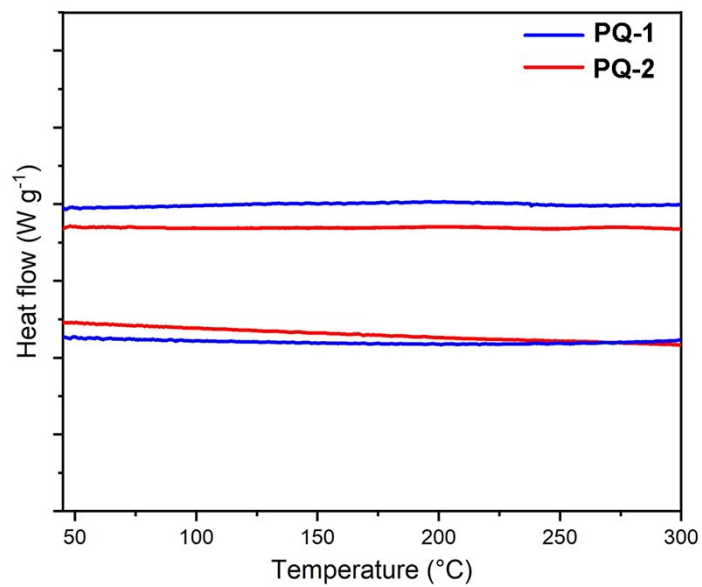

**Figure S16.** DSC plots of the polymers **PQ-1** and **PQ-2**.

### 3.6. Molecular structures of reference materials

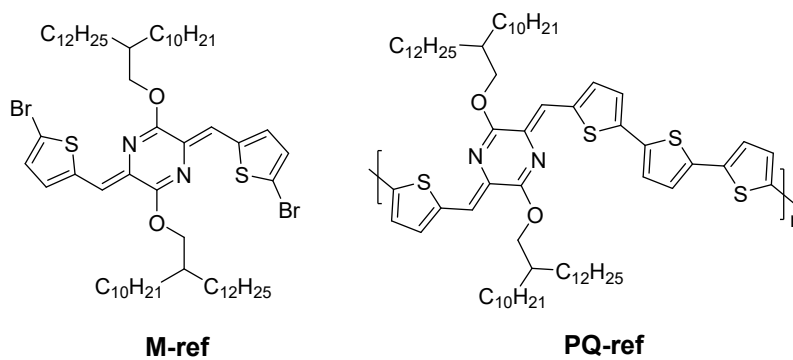

**Figure S17.** Molecular structures of the **M-ref** and **PQ-ref**.

### 3.7. UV-vis absorption spectra of the reference molecule *M-ref*

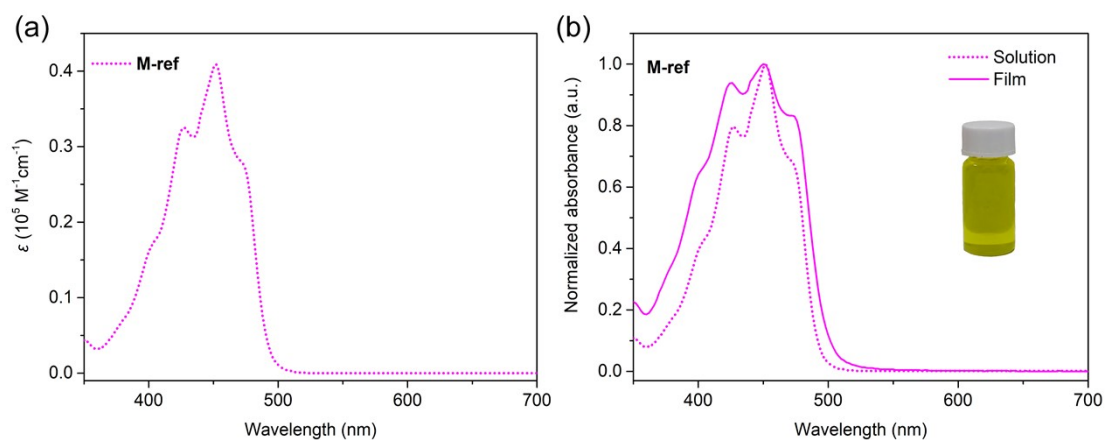

**Figure S18.** (a) UV-vis absorption spectra of **M-ref** in chlorobenzene solution; (b) Normalized UV-vis absorption spectra of **M-ref** in chlorobenzene solution and as thin film.

### 3.8. DFT calculations of model molecules

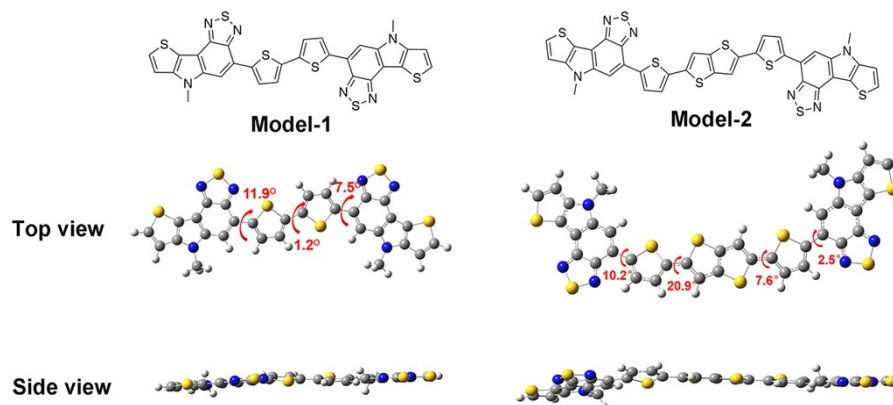

**Figure S19.** Optimized molecular structures of model molecules Model-1 and Model-2.

## 4. Device fabrication and characterization

OFET devices were fabricated in a staggered bottom-gate, top-contact configuration. The polymer samples were dissolved in chloroform or chlorobenzene

at the concentration of 5 mg/mL. The channel semiconductor layers were deposited by spin coating. Thermally deposited (~40 nm) gold with fixed channel length of 80  $\mu\text{m}$  and channel width of 1500  $\mu\text{m}$  was used as source/drain electrode. The field-effect characterizations were conducted at room temperature in ambient conditions using a Keithley 2636B two channel Source/Meter. The field-effect mobility in the saturation regime was extracted from the  $|I_{\text{DS}}|^{1/2}$  vs  $V_{\text{G}}$  plot.

## 5. References

- (1) Hirano T, Hanamura H, Inoue M, *et al.* Synthesis of Soluble, Air-Stable Fully Conjugated Ladder Polymers. *Polymer*, 2019, 177: 282-289.
- (2) Qian G, Wang X, Wang S, *et al.* Polymorphous Luminescent Materials Based on 'T'-Shaped Molecules Bearing 4,7-Diphenylbenzo[*c*][1,2,5]thiadiazole Skeletons: Effect of Substituents on the Photophysical Properties. *Chemistry – A European Journal* 2019, 25(67): 15401-15410.
- (3) Liu X, He B, Anderson C, *et al.* *para*-Azaquinodimethane: A Compact Quinodimethane Variant as an Ambient Stable Building Block for High-Performance Low Band Gap Polymers. *Journal of the American Chemical Society*, 2017, 139(24): 8355-8363.
